# Supplementary material for: Synthesis, “turn-on” fluorescence signals towards Zn2+ and Hg2+ and monoamine oxidase A inhibitory activity using a molecular docking approach of morpholine analogue Schiff base linked organosilanes
Source: Royal Society of Chemistry journal article supplement (doi:10.1039/d2nj03767j), 2022-01-01
Supplement: d2nj03767j1.pdf [file d2nj03767j1.pdf]

### *Supporting Information*

## **Synthesis, “turn-on” fluorescent signals towards Zn<sup>2+</sup> and Hg<sup>2+</sup> and monoamine oxidase A inhibitory activity using molecular docking approach of morpholine analogue Schiff base linked organosilanes.**

Gurjaspreet Singh<sup>a\*</sup>, Anita Devi<sup>a\*</sup>, Mohit<sup>a</sup>, Diksha<sup>a</sup>, Suman<sup>a</sup>, Anamika Saini<sup>a</sup>, Jashan Deep Kaur<sup>a</sup>, Sofia Gupta<sup>a</sup>, Vikas<sup>a</sup>

<sup>a</sup>Department of Chemistry, Panjab University, Chandigarh, 160014, India

\*Corresponding Authors

Prof. Gurjaspreet Singh

Department of Chemistry & Centre of Advanced Studies

Panjab University, Chandigarh, India

Email: [gjpsingh@pu.ac.in](mailto:gjpsingh@pu.ac.in)

Tel. No: 0172-2534428, 09814302099, 9317502099

Fax No: 0172-2545074

Miss Anita Devi

Research Scholar

Department of Chemistry & Centre of Advanced Studies

Panjab University, Chandigarh, India

Email: [anitadevi0025@gmail.com](mailto:anitadevi0025@gmail.com)

Tel. No: 9877382634

| <b>Entry</b>                                                                                                                                                                                                                                                                                  | <b>Page No.</b> |
|-----------------------------------------------------------------------------------------------------------------------------------------------------------------------------------------------------------------------------------------------------------------------------------------------|-----------------|
| <sup>1</sup> H NMR spectrum of compound 4a (Fig.S1)                                                                                                                                                                                                                                           | 3               |
| <sup>1</sup> H NMR spectrum of compound 4b (Fig.S2)                                                                                                                                                                                                                                           | 3               |
| <sup>1</sup> H NMR spectrum of compound 4c (Fig.S3)                                                                                                                                                                                                                                           | 4               |
| <sup>1</sup> H NMR spectrum of compound 5a (Fig.S4)                                                                                                                                                                                                                                           | 4               |
| <sup>1</sup> H NMR spectrum of compound 5b (Fig.S5)                                                                                                                                                                                                                                           | 5               |
| <sup>1</sup> H NMR spectrum of compound 5c (Fig.S6)                                                                                                                                                                                                                                           | 5               |
| <sup>13</sup> C NMR spectrum of compound 4a (Fig.S7)                                                                                                                                                                                                                                          | 6               |
| <sup>13</sup> C NMR spectrum of compound 4b (Fig.S8)                                                                                                                                                                                                                                          | 6               |
| <sup>13</sup> C NMR spectrum of compound 4c (Fig.S9)                                                                                                                                                                                                                                          | 7               |
| <sup>13</sup> C NMR spectrum of compound 5a (Fig.S10)                                                                                                                                                                                                                                         | 7               |
| <sup>13</sup> C NMR spectrum of compound 5b (Fig.S11)                                                                                                                                                                                                                                         | 8               |
| <sup>13</sup> C NMR spectrum of compound 5c (Fig.S12)                                                                                                                                                                                                                                         | 8               |
| Mass spectrum of compound 4a (Fig.S13)                                                                                                                                                                                                                                                        | 9               |
| Mass spectrum of compound 4b (Fig.S14)                                                                                                                                                                                                                                                        | 9               |
| Mass spectrum of compound 4c (Fig.S15)                                                                                                                                                                                                                                                        | 10              |
| Mass spectrum of compound 5a (Fig.S16)                                                                                                                                                                                                                                                        | 10              |
| Mass spectrum of compound 5b (Fig.S17)                                                                                                                                                                                                                                                        | 11              |
| Mass spectrum of compound 5c (Fig.S18)                                                                                                                                                                                                                                                        | 11              |
| (a) Absorption spectra of receptor 5a in the presence of various metal ions in MeOH–H <sub>2</sub> O (9:1 v/v) solvent. UV-Visible absorption spectra after addition of increasing amount of (b) Zn <sup>2+</sup> (c) Hg <sup>2+</sup> in MeOH-H <sub>2</sub> O (9:1 v/v) solution. (Fig.S19) | 12              |
| Linear regression plot (S20a-S20b) and Benesi–Hildebrand plot (S20c-S20d) of receptor 5a with Zn <sup>2+</sup> and Hg <sup>2+</sup> , using UV-Visible titration data, respectively. (Fig.S20)                                                                                                | 13              |
| Job's Plot for receptor 5a (a) Zn <sup>2+</sup> and (b) Hg <sup>2+</sup> . (Fig.S21)                                                                                                                                                                                                          | 13              |
| <sup>1</sup> H NMR spectrum of compound 5a and Zn <sup>2+</sup> complex (Fig.S22)                                                                                                                                                                                                             | 14              |
| <sup>1</sup> H NMR spectrum of compound 5a and Hg <sup>2+</sup> complex (Fig.S23)                                                                                                                                                                                                             | 14              |

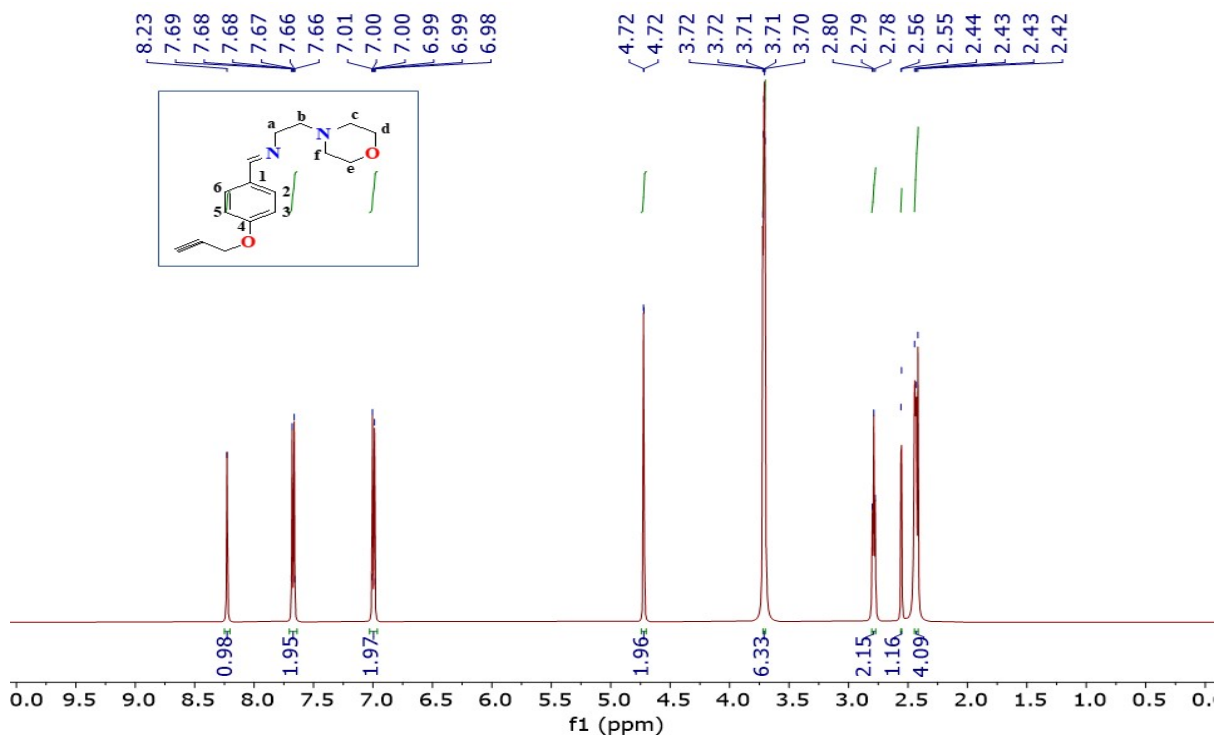

(Fig.S1)  $^1\text{H}$  NMR spectrum of compound 4a

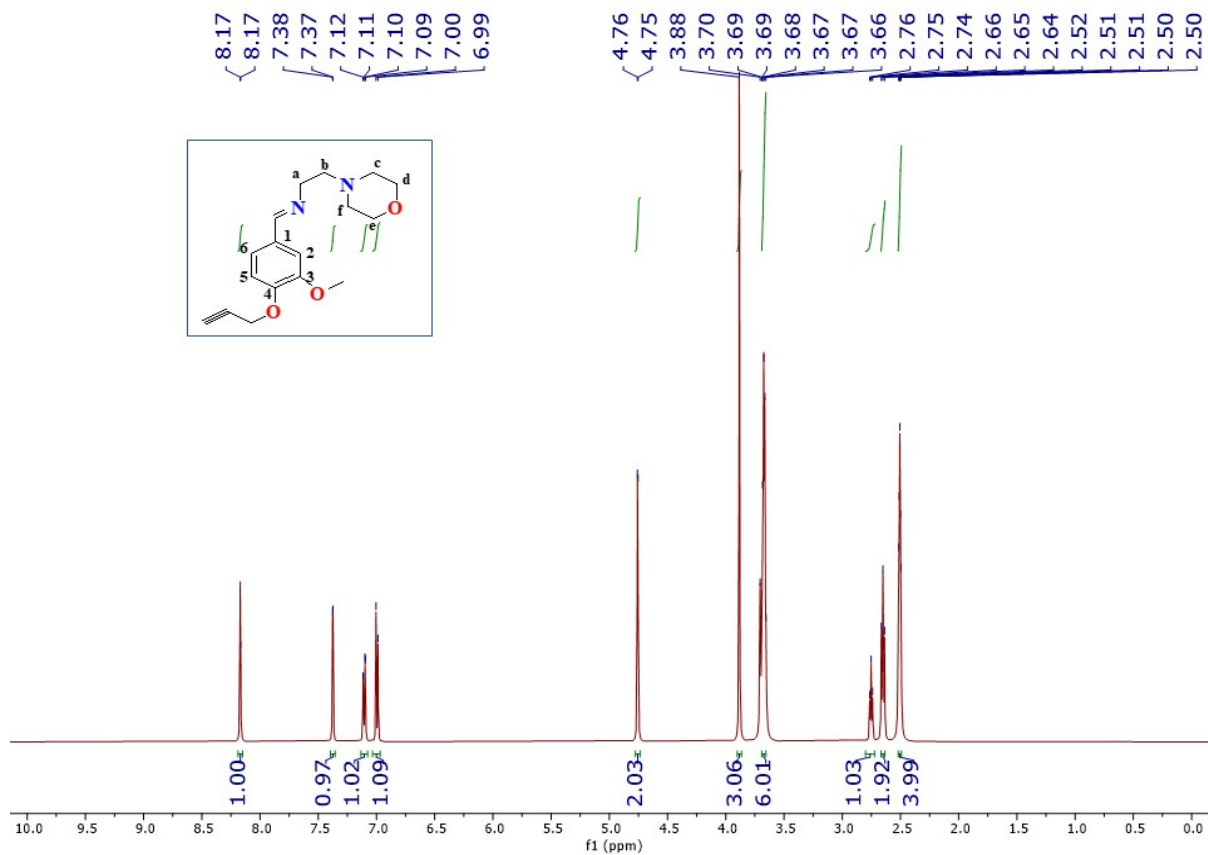

(Fig.S2)  $^1\text{H}$  NMR spectrum of compound 4b

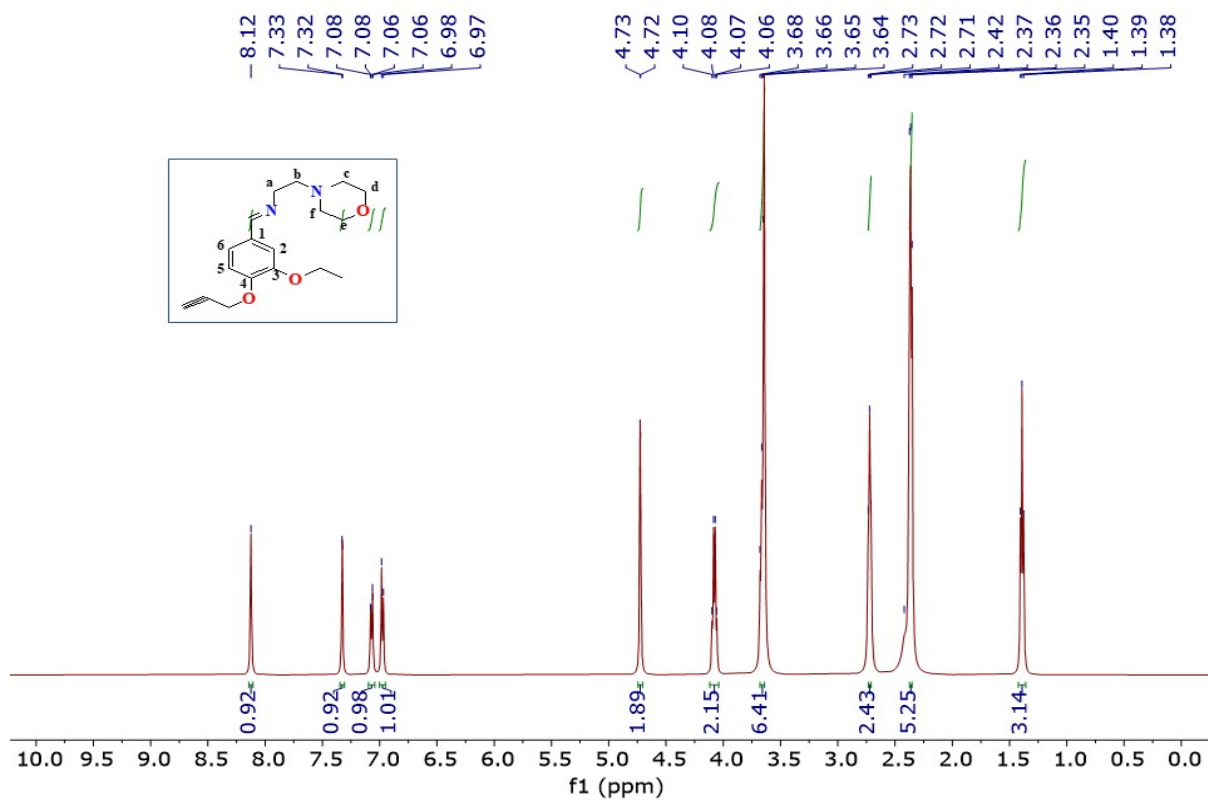

(Fig.S3)  $^1\text{H}$  NMR spectrum of compound 4c

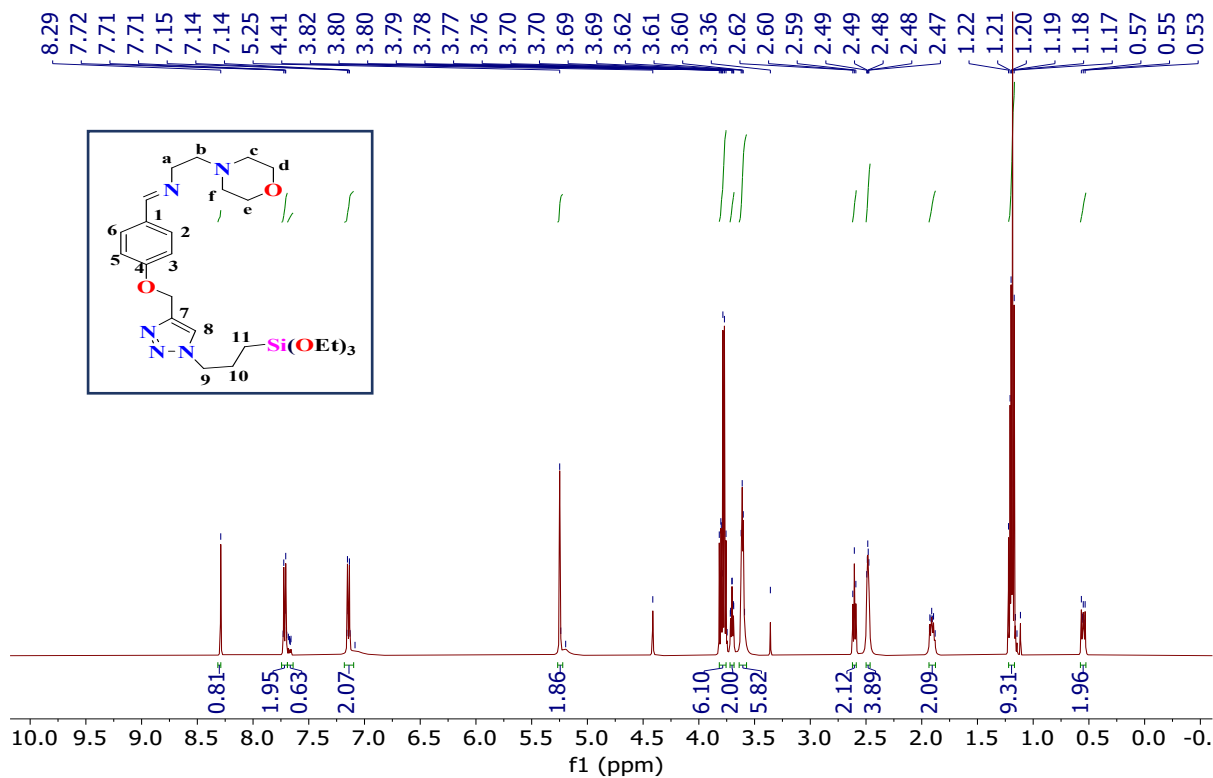

(Fig.S4)  $^1\text{H}$  NMR spectrum of compound 5a

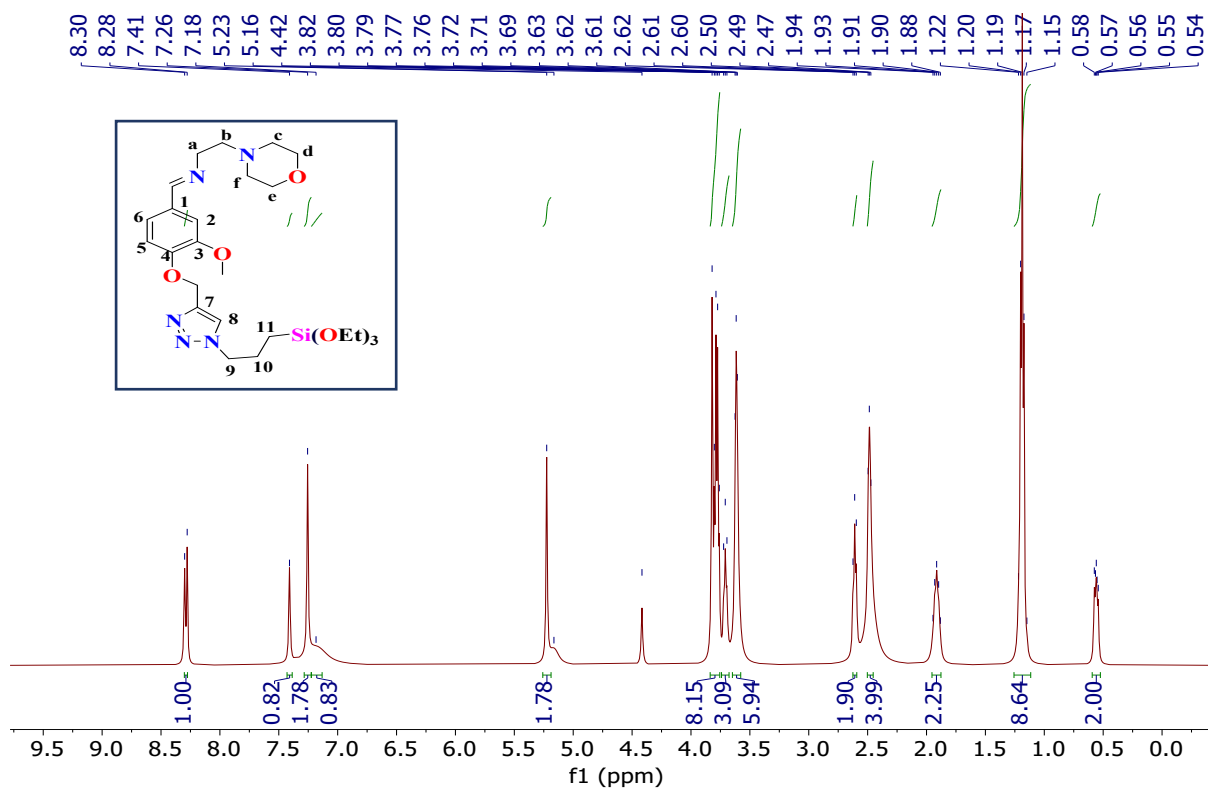

(Fig.S5)  $^1\text{H}$  NMR spectrum of compound 5b

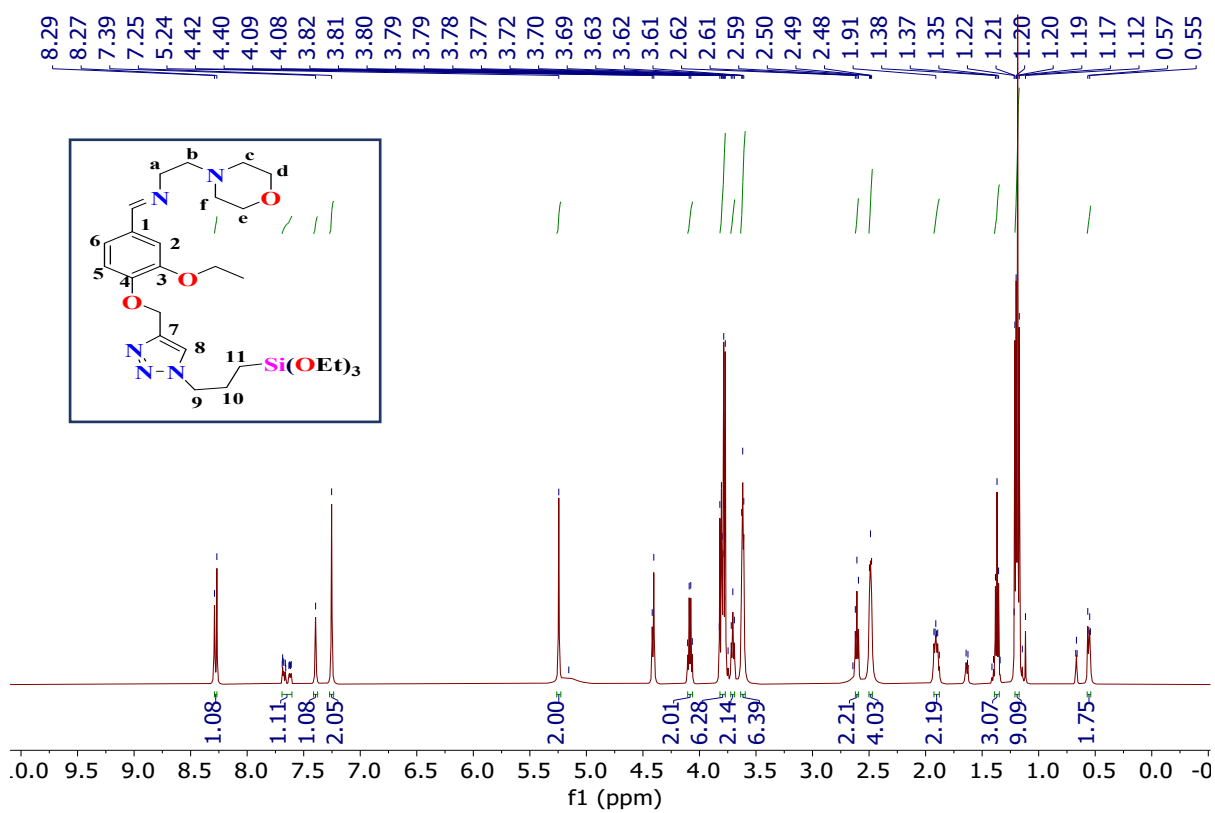

(Fig.S6)  $^1\text{H}$  NMR spectrum of compound 5c

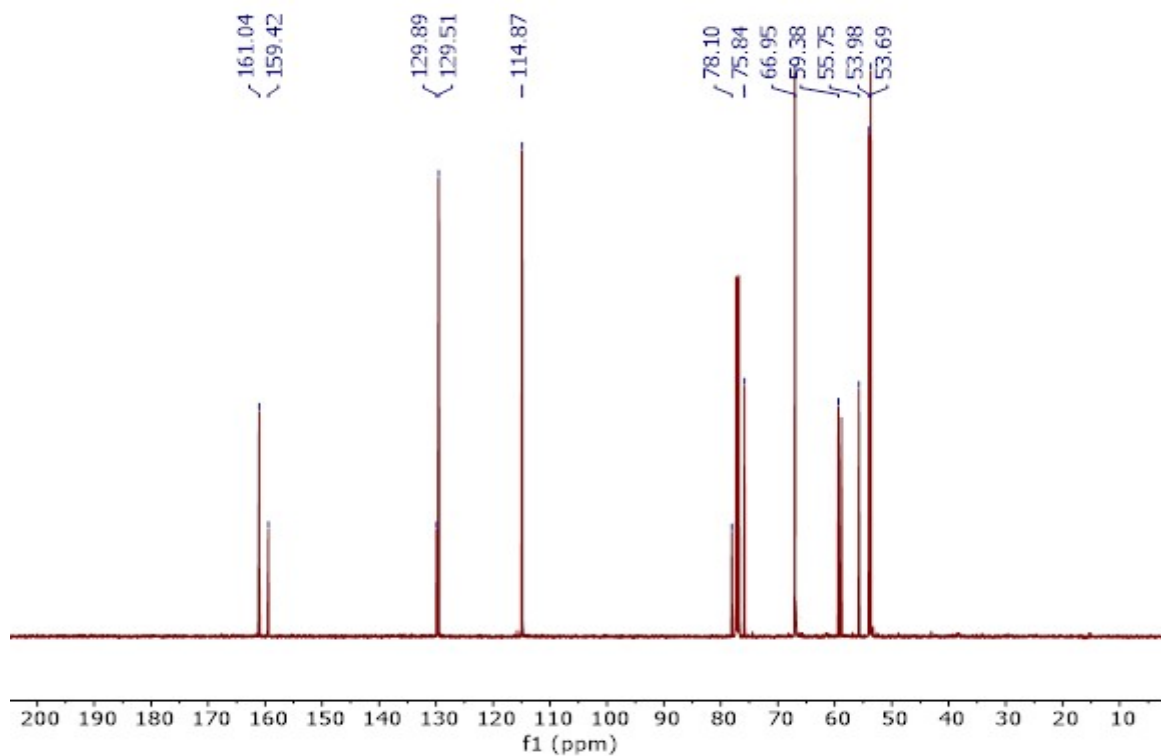

(Fig.S7)  $^{13}\text{C}$  NMR spectrum of compound 4a

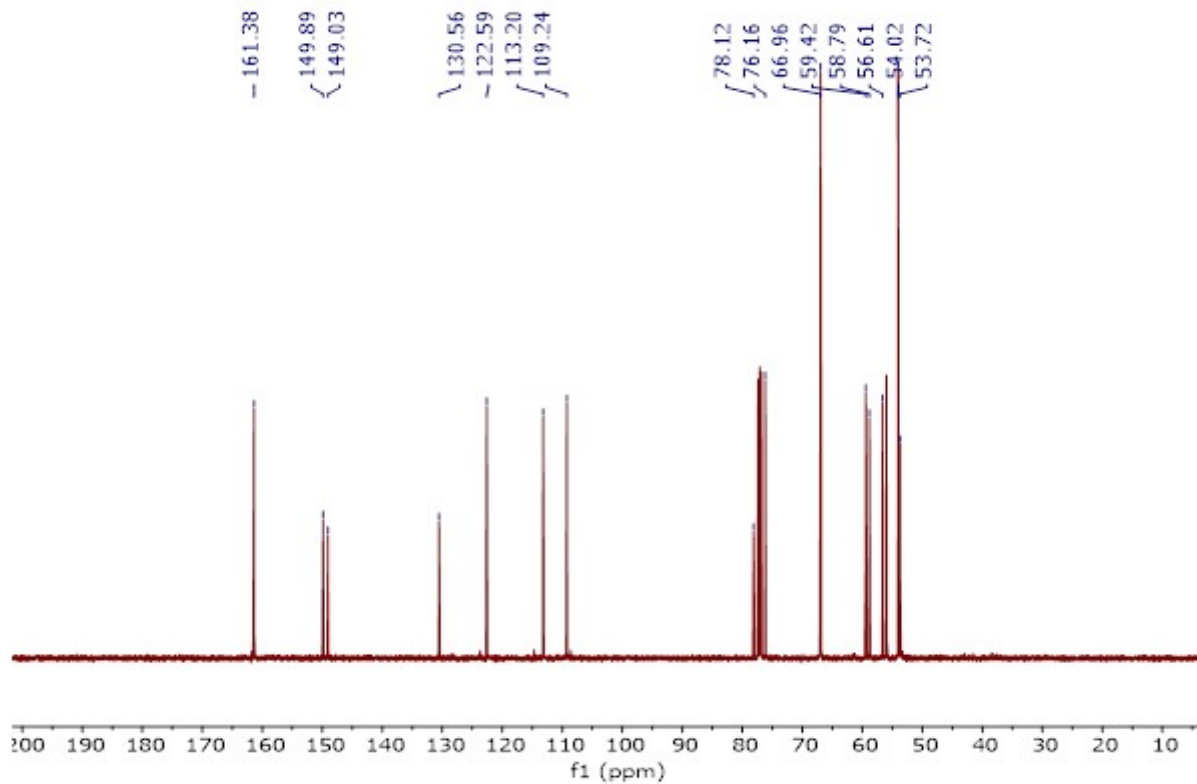

(Fig.S8)  $^{13}\text{C}$  NMR spectrum of compound 4b

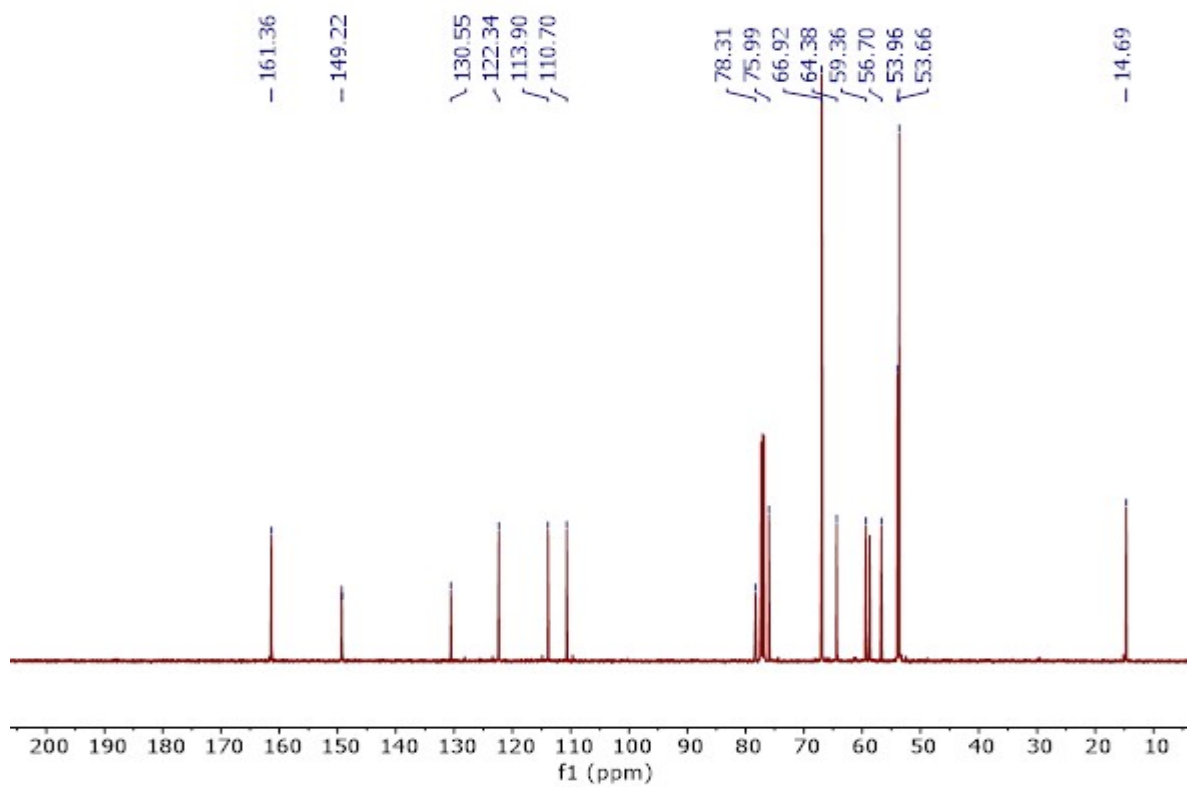

(Fig.S9)  $^{13}\text{C}$  NMR spectrum of compound 4c

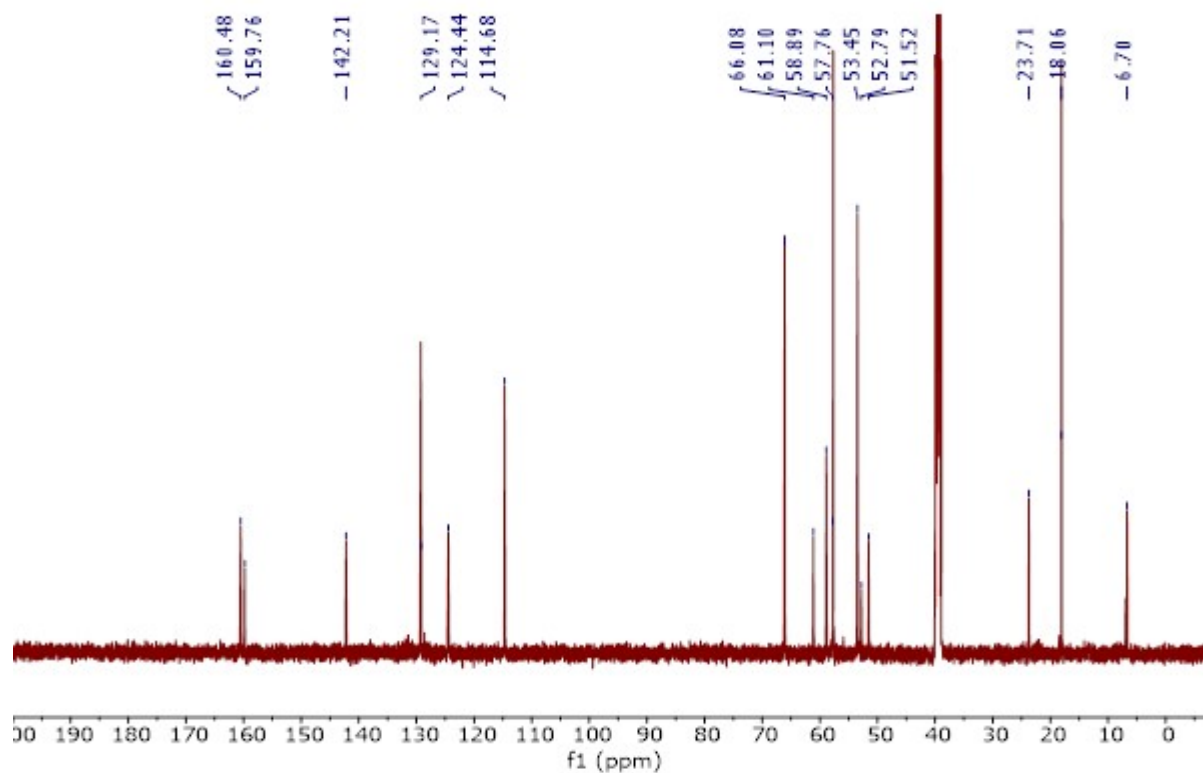

(Fig.S10)  $^{13}\text{C}$  NMR spectrum of compound 5a

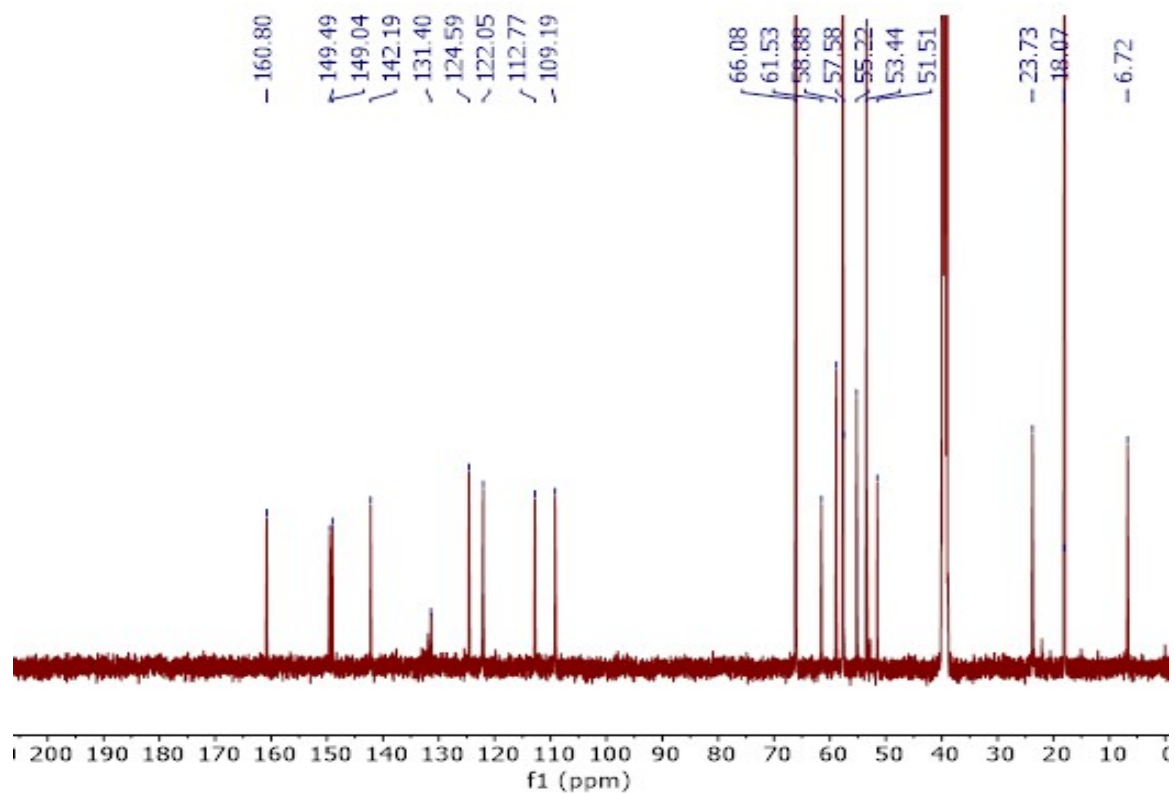

(Fig.S11)  $^{13}\text{C}$  NMR spectrum of compound 5b

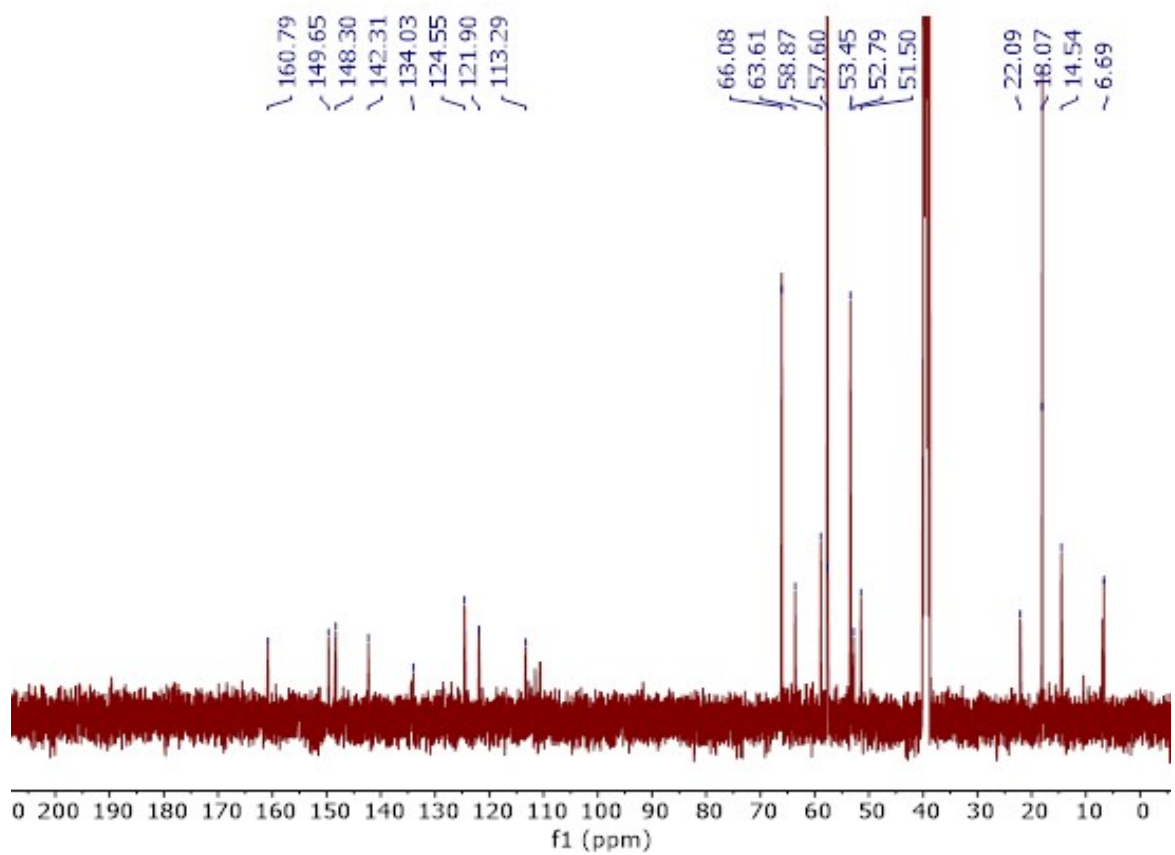

(Fig.S12)  $^{13}\text{C}$  NMR spectrum of compound 5c



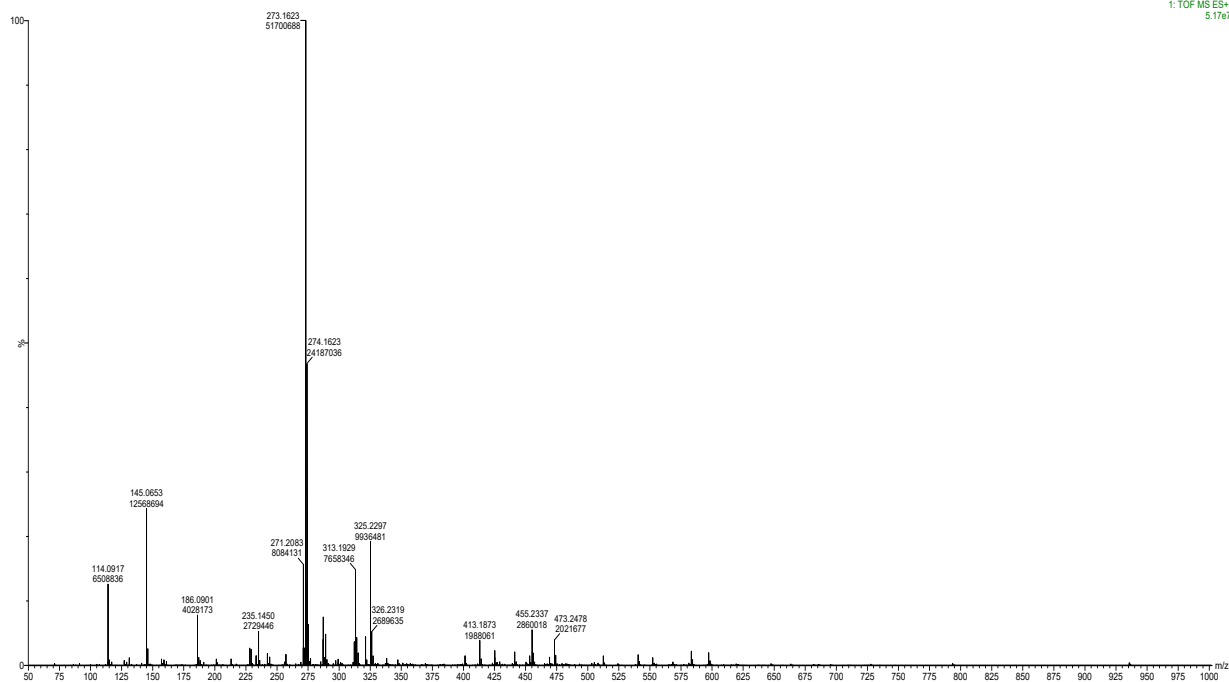

(Fig.S13) Mass spectrum of compound 4c

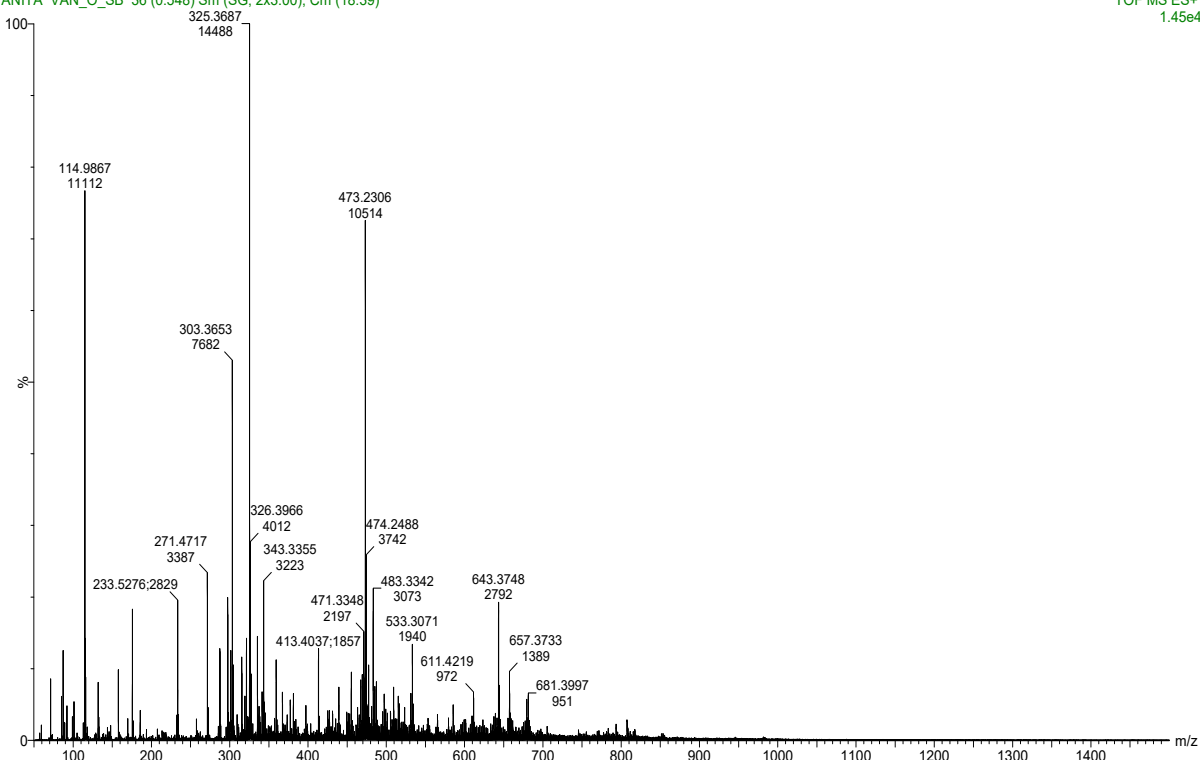

(Fig.S14) Mass spectrum of compound 4b

WATERS,Q-TOF MICROMASS (ESI-MS)  
ANITA NH2\_SB\_ET 22 (0.335) Sm (SG, 2x3.00); Cm (1:23)

SAIF/CIL,PANJAB UNIVERSITY,CHANDIGARH  
TOF MS ES+  
1.32e4

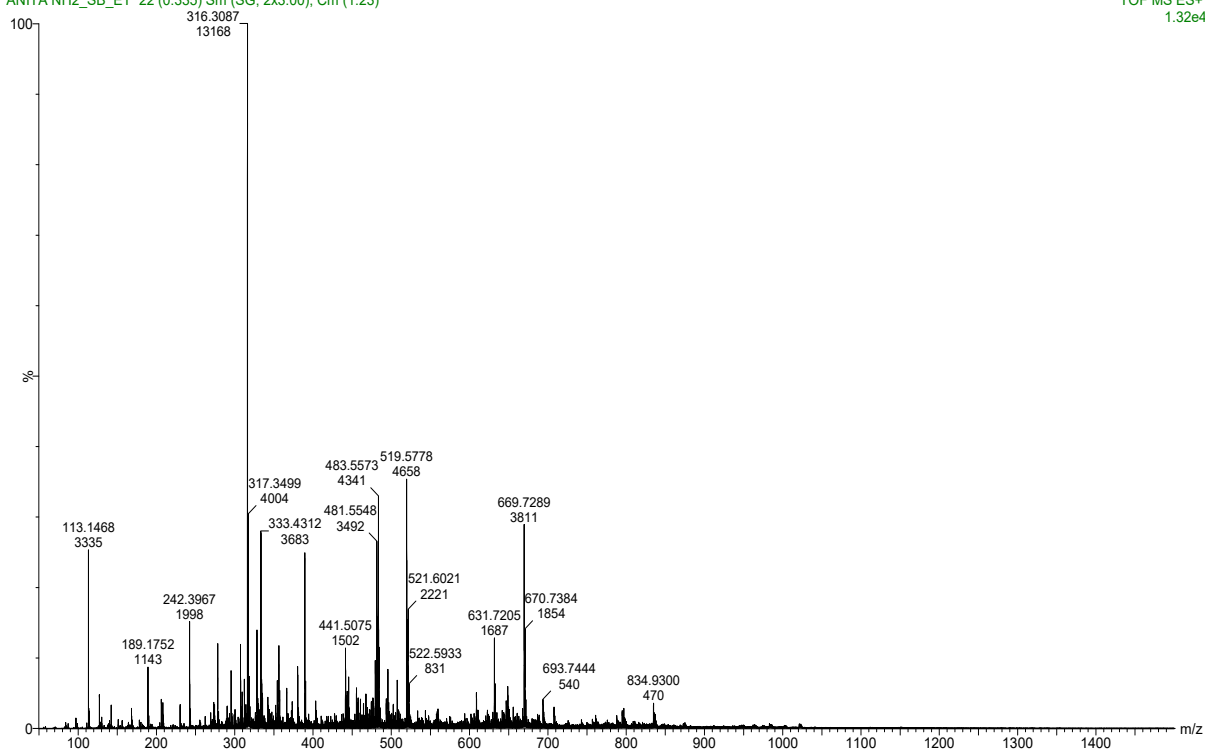

(Fig.S15) Mass spectrum of compound 4c

WATERS,Q-TOF MICROMASS (ESI-MS)  
ANITA P\_OH\_O\_TRI 53 (0.807) Sm (SG, 2x3.00); Cm (34:53)

SAIF/CIL,PANJAB UNIVERSITY,CHANDIGARH  
TOF MS ES+  
1.55e4

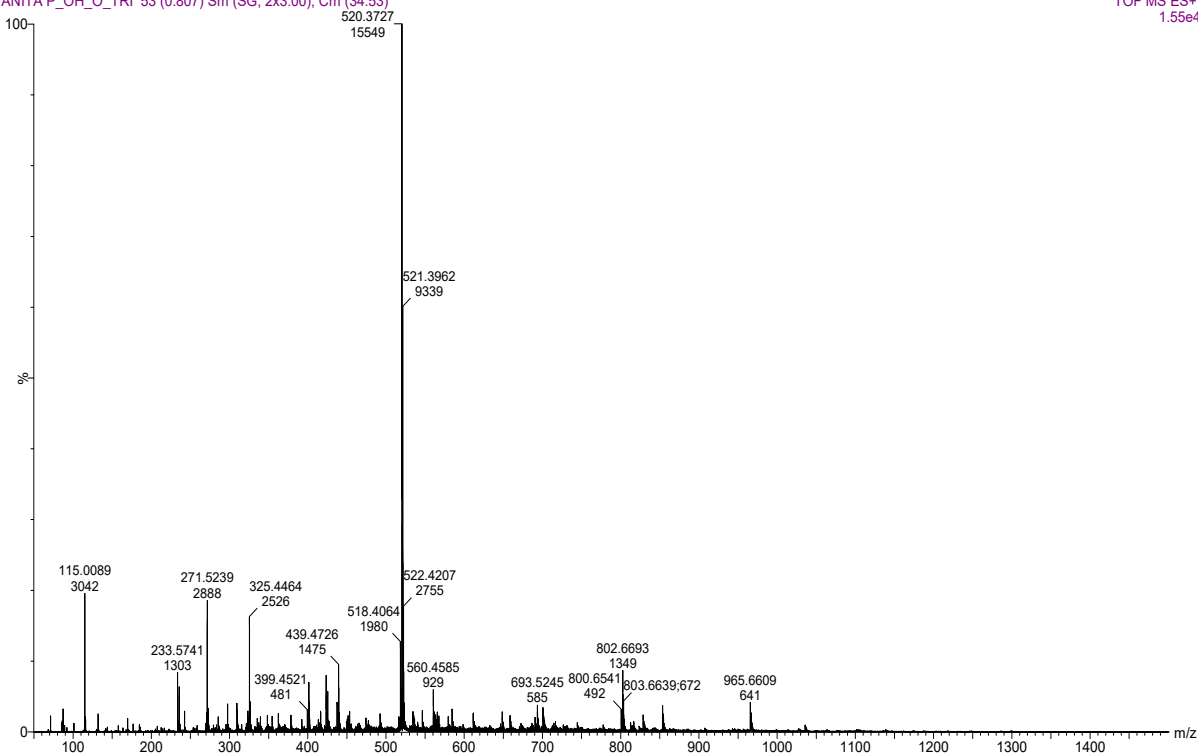

(Fig.S16) Mass spectrum of compound 5a

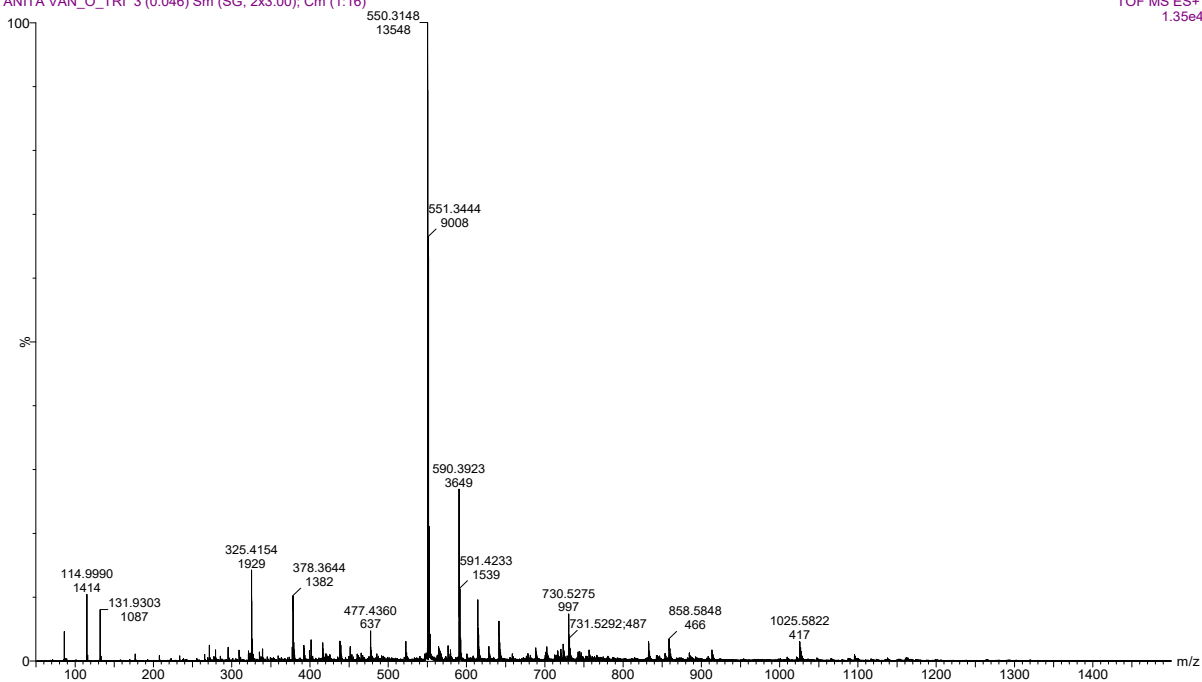

(Fig.S17) Mass spectrum of compound 5b

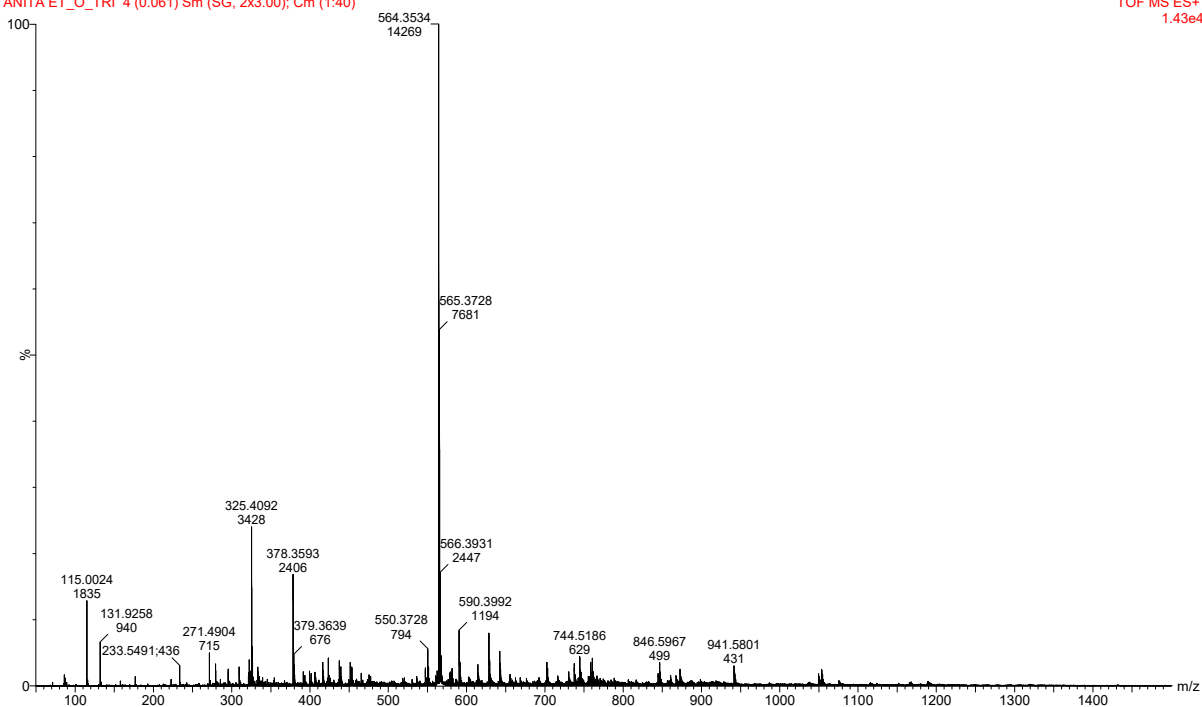

(Fig.S18) Mass spectrum of compound 5c

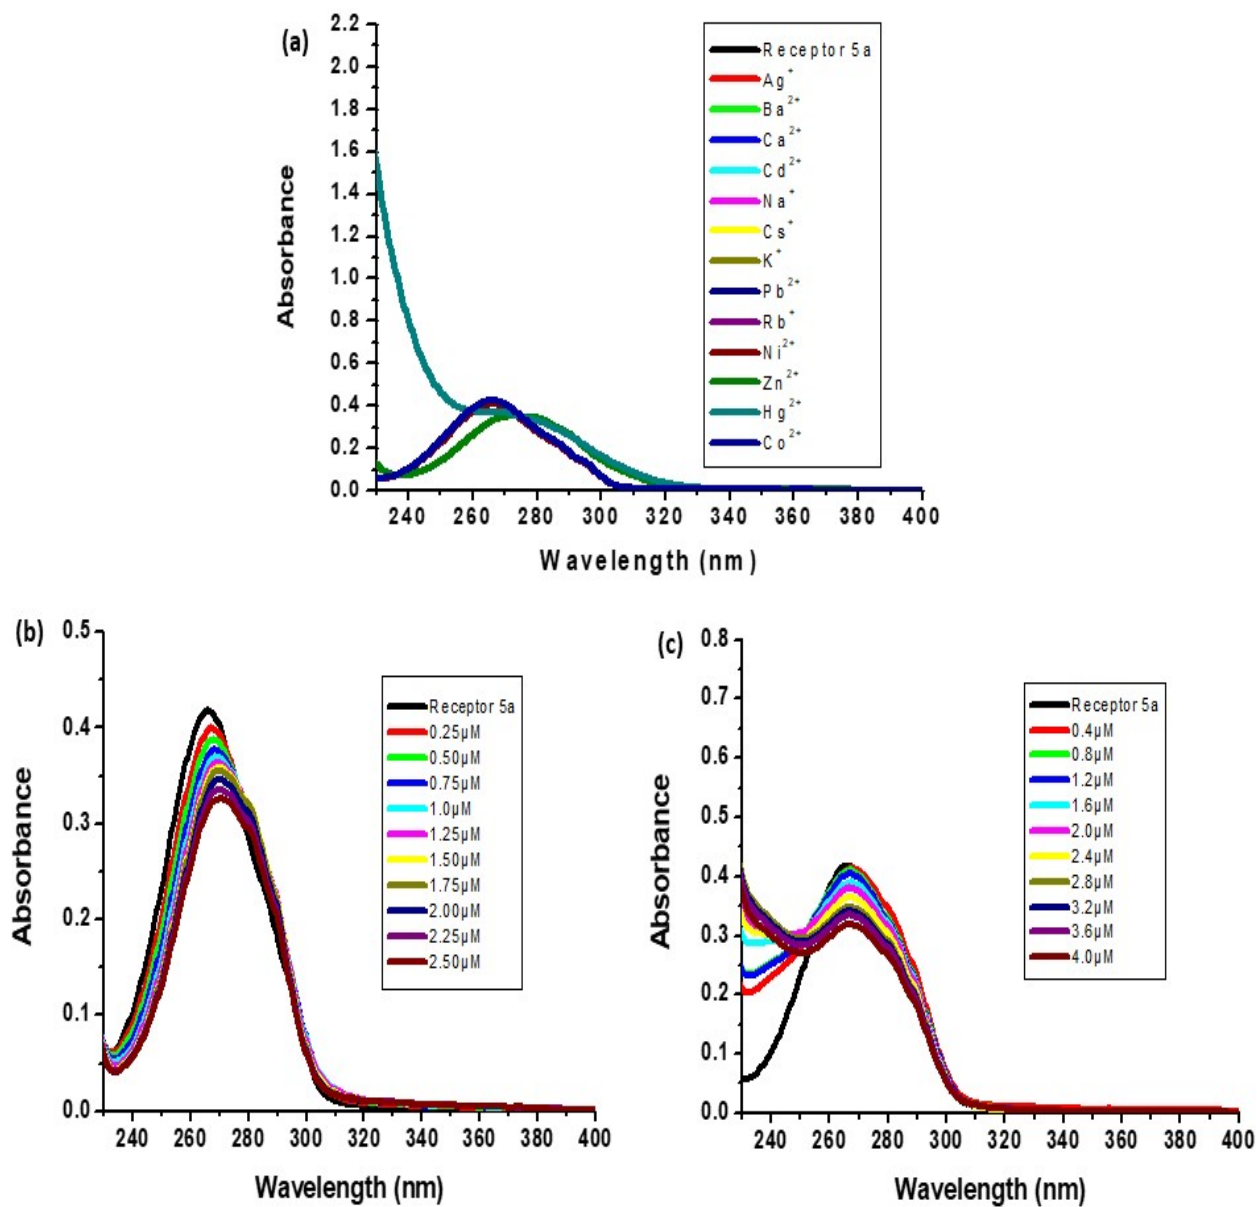

(Fig.S19) (a) Absorption spectra of receptor 5a in the presence of various metal ions in MeOH–H<sub>2</sub>O (9:1 v/v) solvent. UV-Visible absorption spectra after addition of increasing amount of (b) Zn<sup>2+</sup> (c) Hg<sup>2+</sup> in MeOH-H<sub>2</sub>O (9:1 v/v) solution.

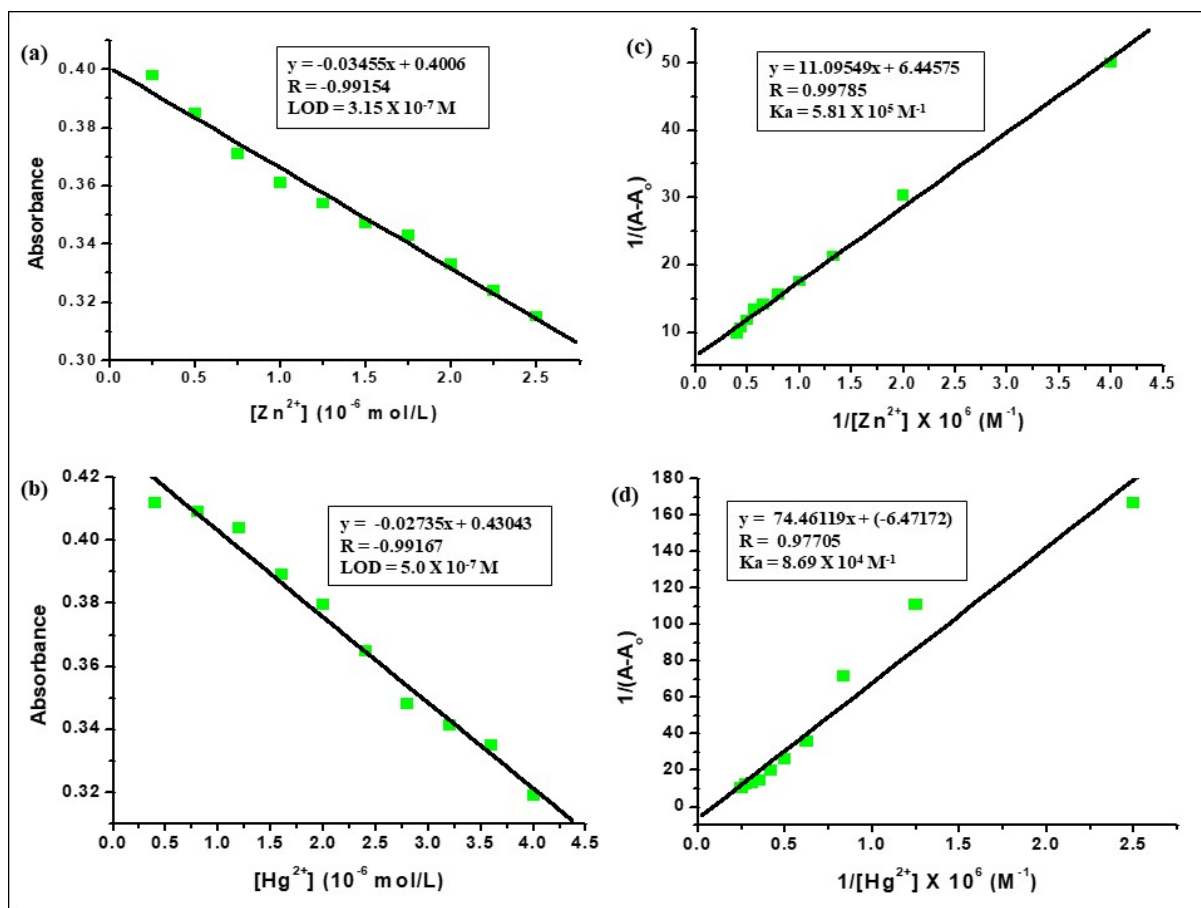

(Fig.S20) Linear regression plot (S20a-S20b) and Benesi–Hildebrand plot (S20c-S20d) of receptor 5a with Zn<sup>2+</sup> and Hg<sup>2+</sup>, using UV-Visible titration data, respectively.

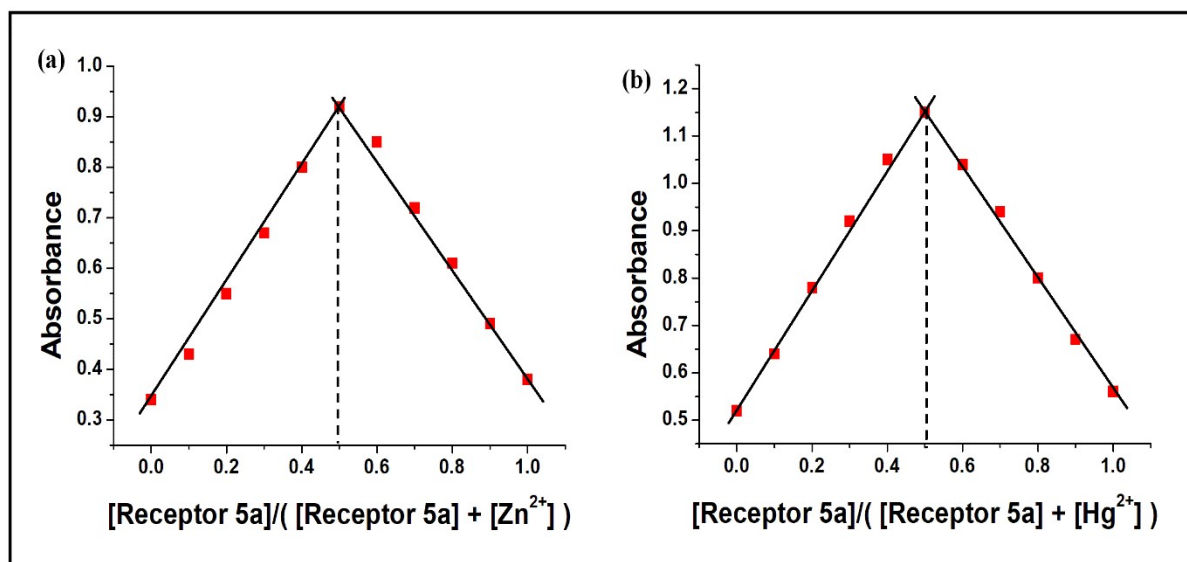

(Fig.S21) Job's Plot for receptor 5a (a) Zn<sup>2+</sup> and (b) Hg<sup>2+</sup>.

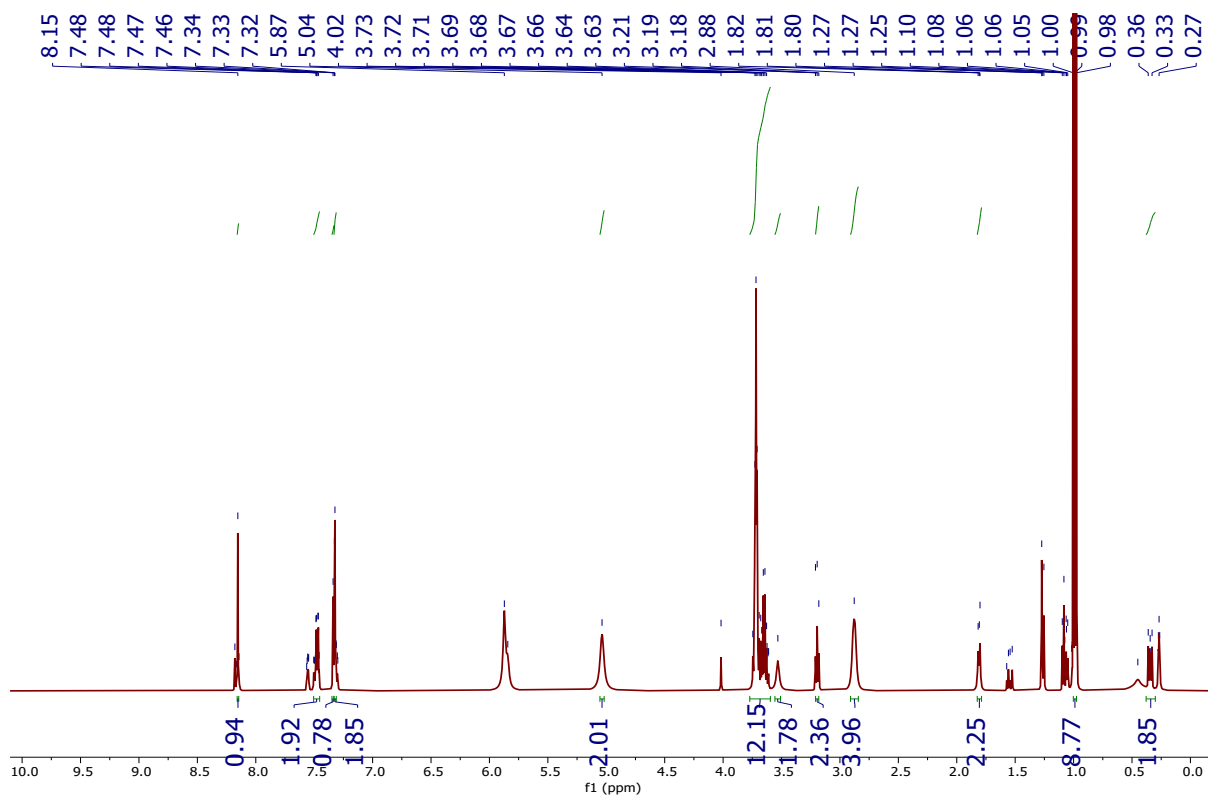

(Fig.S22)  $^1\text{H}$  NMR spectrum of compound 5a and  $\text{Zn}^{2+}$  complex

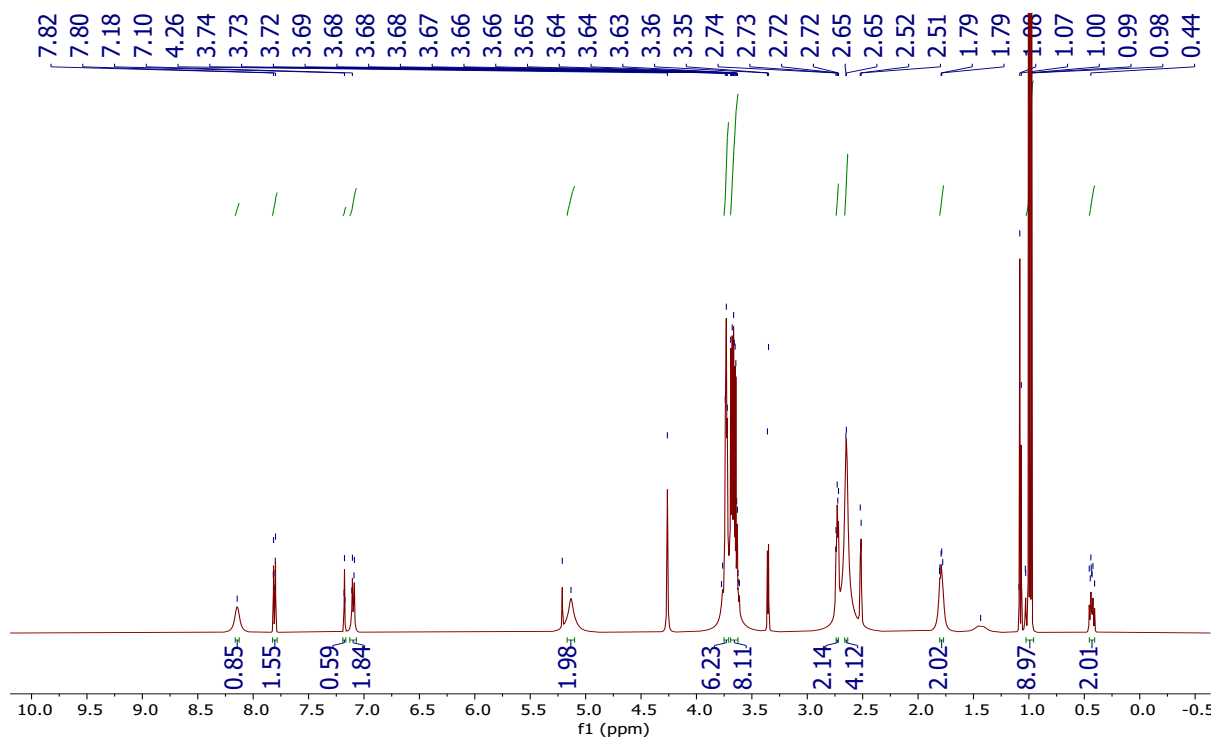

(Fig.S23)  $^1\text{H}$  NMR spectrum of compound 5a and  $\text{Hg}^{2+}$  complex
